# Supplementary material for: High Prevalence Rate of Microbial Contamination in Patient-Ready Gastrointestinal Endoscopes in Tehran, Iran: an Alarming Sign for the Occurrence of Severe Outbreaks
Source: PubMed Central journal article supplement (PMC9602500; doi:10.1128/spectrum.01897-22), 2022-09-29
Supplement: spectrum.01897-22-s0001.pdf [file spectrum.01897-22-s0001.pdf]

## Supplemental Tables.

**Table S1.** Results of microbiological surveillance of different GI endoscopes types and automated endoscope reprocessors

| Hospital     | Type of hospital | Time of HLD changing (time between Phase I and II) | Specimen source (Sample site)               | Contamination ratio, isolated microorganisms                                                                                                                                                                                                    |                                                                                                                                                   | MDRO detection |          | Viral detection      |          |
|--------------|------------------|----------------------------------------------------|---------------------------------------------|-------------------------------------------------------------------------------------------------------------------------------------------------------------------------------------------------------------------------------------------------|---------------------------------------------------------------------------------------------------------------------------------------------------|----------------|----------|----------------------|----------|
|              |                  |                                                    |                                             | Phase I                                                                                                                                                                                                                                         | Phase II                                                                                                                                          | Phase I        | Phase II | Phase I              | Phase II |
| Hospital I   | ATRC             | 12 days                                            | Colonoscopes, n=4 (biopsy/suction channel)  | 50%,<br>C1: <i>C. difficile</i> ( <i>tcdA</i> <sup>+</sup> , <i>tcdB</i> <sup>+</sup> ).<br>C2: <i>C. difficile</i> ( <i>tcdA</i> <sup>+</sup> , <i>tcdB</i> <sup>+</sup> ).                                                                    | 50%,<br>C1: <i>K. pneumoniae</i> .<br>C2: <i>K. pneumoniae</i> .                                                                                  | Yes            | Yes      | No                   | No       |
|              |                  |                                                    | Duodenoscopes, n=2 (biopsy/suction channel) | 100%,<br>D1: <i>C. freundii</i> ; <i>C. difficile</i> ( <i>tcdA</i> <sup>+</sup> , <i>tcdB</i> <sup>+</sup> ).<br>D2: <i>E. faecalis</i> ; <i>C. difficile</i> ( <i>tcdA</i> <sup>+</sup> , <i>tcdB</i> <sup>+</sup> ); <i>C. glabrata</i> .    | 0%,<br>No growth                                                                                                                                  | Yes            | No       | No                   | No       |
|              |                  |                                                    | Duodenoscopes, n=2 (elevator channel)       | 100%,<br>D1: <i>C. freundii</i> ; <i>S. maltophilia</i> ; <i>C. difficile</i> ( <i>tcdA</i> <sup>+</sup> , <i>tcdB</i> <sup>+</sup> ).<br>D2: <i>E. faecalis</i> ; <i>C. difficile</i> ( <i>tcdA</i> <sup>+</sup> , <i>tcdB</i> <sup>+</sup> ). | 50%,<br>D2: <i>P. aeruginosa</i>                                                                                                                  | Yes            | No       | No                   | No       |
| Hospital II  | ATRC             | 5 days                                             | Duodenoscopes, n=2 (biopsy/suction channel) | 50%,<br><i>K. pneumoniae</i> ;<br><i>P. aeruginosa</i> .                                                                                                                                                                                        | 50%,<br><i>B. cepacia</i> ; <i>K. pneumoniae</i> .                                                                                                | Yes            | Yes      | No                   | No       |
|              |                  |                                                    | Duodenoscopes, n=2 (elevator channel)       | 100%,<br>D1: <i>K. pneumoniae</i> ;<br><i>P. aeruginosa</i> .<br>D2: <i>E. faecium</i> .                                                                                                                                                        | 50%,<br><i>B. cepacia</i> ; <i>K. pneumoniae</i> .                                                                                                | Yes            | Yes      | No                   | No       |
|              |                  |                                                    | Colonoscopes, n=4 (biopsy/suction channel)  | 50%,<br>C1: <i>P. aeruginosa</i> ;<br>XDR-A. <i>baumannii</i> <sup>a</sup> .<br>C3: <i>E. coli</i> .                                                                                                                                            | 50%,<br>C1: <i>K. pneumoniae</i> .<br>C2: <i>K. pneumoniae</i> .                                                                                  | Yes            | Yes      | No                   | No       |
|              |                  |                                                    | AER, n=1 (HLD solution)                     | 100%,<br><i>K. pneumoniae</i>                                                                                                                                                                                                                   | 100%,<br><i>K. pneumoniae</i> .                                                                                                                   | Yes            | Yes      | No                   | No       |
| Hospital III | ATRC             | 28 days                                            | Colonoscopes, n=2 (biopsy/suction channel)  | 50%,<br><i>C. albicans</i> ; <i>C. glabrata</i> ; <i>K. pneumoniae</i> .                                                                                                                                                                        | 0%,<br>No growth                                                                                                                                  | Yes            | No       | No                   | No       |
|              |                  |                                                    | Gastrosopes, n=2 (biopsy/suction channel)   | 50%,<br><i>C. albicans</i> ;<br><i>Moraxella</i> spp.                                                                                                                                                                                           | 100%,<br>G1: <i>K. pneumoniae</i> .<br>G2: <i>P. aeruginosa</i> .                                                                                 | No             | Yes      | Yes,<br>TTV          | No       |
| Hospital IV  | ATRC             | 28 days                                            | Colonoscopes, n=4 (biopsy/suction channel)  | 100%,<br>C1: <i>K. pneumoniae</i> ;<br><i>S. paucimobilis</i> .<br>C2: <i>S. paucimobilis</i><br>C3: <i>P. aeruginosa</i><br>[2 different strains]; <i>K. pneumoniae</i> ; <i>S. paucimobilis</i>                                               | 75%,<br>C2: <i>K. pneumoniae</i> ;<br><i>S. paucimobilis</i><br>C3: <i>E. faecalis</i><br>[VRE]<br>C4: <i>P. aeruginosa</i> ;<br><i>C. koseri</i> | Yes            | Yes      | Yes,<br>HBV;<br>HCV. | No       |

|               |      |         |                                                     |                                                                                                                               |                                                                                                                                                           |     |     |                            |                           |
|---------------|------|---------|-----------------------------------------------------|-------------------------------------------------------------------------------------------------------------------------------|-----------------------------------------------------------------------------------------------------------------------------------------------------------|-----|-----|----------------------------|---------------------------|
|               |      |         |                                                     | C4: <i>K. pneumoniae</i> ; <i>S. paucimobilis</i> .                                                                           |                                                                                                                                                           |     |     |                            |                           |
|               |      |         | Gastrosopes, n=3 (biopsy/suction channel)           | 100%, G1: <i>P. aeruginosa</i> . G2: <i>P. aeruginosa</i> ; <i>S. paucimobilis</i> . G3: <i>S. paucimobilis</i> .             | 33%, G1: <i>P. aeruginosa</i> ; <i>S. paucimobilis</i> .                                                                                                  | Yes | Yes | Yes, HBV.                  | No                        |
|               |      |         | AERs, n=2 (swab sample)                             | 100%, AER1: <i>S. paucimobilis</i> ; CoNS; nondiphtherial- <i>Corynebacterium</i> spp. AER2: <i>Bacillus</i> spp.             | 50%, AER1: <i>S. paucimobilis</i> ; CoNS.                                                                                                                 | No  | No  | No                         | No                        |
| Hospital V    | ATRC | 28 days | Duodenoscopes, n=2 (biopsy/suction channel)         | 50%, <i>P. aeruginosa</i> ; <i>A. baumannii</i> .                                                                             | 50%, <i>P. aeruginosa</i>                                                                                                                                 | Yes | No  | No                         | No                        |
|               |      |         | Duodenoscopes, n=2 (elevator channel)               | 50%, <i>P. aeruginosa</i> ; <i>K. pneumoniae</i> .                                                                            | 50%, <i>P. aeruginosa</i>                                                                                                                                 | Yes | No  | No                         | No                        |
|               |      |         | Gastrosopes, n=3 (biopsy/suction channel)           | 33.3%, <i>P. aeruginosa</i>                                                                                                   | 33.3%, <i>C. albicans</i> ; <i>P. aeruginosa</i> .                                                                                                        | Yes | Yes | No                         | No                        |
|               |      |         | AERs, n=1 (swab sample)                             | 100%, CoNS; <i>P. aeruginosa</i>                                                                                              | 0%, No growth                                                                                                                                             | Yes | No  | No                         | No                        |
| Hospital VI   | PSC  | 14 days | Gastrosopes, n=4 (biopsy/suction channel)           | 75%, G1: <i>C. albicans</i> . G2: <i>C. albicans</i> ; <i>P. aeruginosa</i> . G3: <i>P. aeruginosa</i> ; <i>C. albicans</i> . | 25%, <i>C. parapsilosis</i>                                                                                                                               | Yes | No  | No                         | No                        |
|               |      |         | Colonoscopes, n=4 (biopsy/suction channel)          | 25%, <i>P. aeruginosa</i> ; <i>E. cloacae</i> .                                                                               | 25%, <i>P. aeruginosa</i> ; <i>C. koseri</i> .                                                                                                            | Yes | Yes | Yes, HIV (180 GC/ml); TTV. | Yes, HBV; TTV.            |
| Hospital VII  | ATRC | 14 days | Colonoscopes, n=2 (biopsy/suction channel)          | 100%, C1: <i>C. perfringens</i> . C2: <i>C. perfringens</i> .                                                                 | 0%, No growth.                                                                                                                                            | No  | No  | Yes, HBV; HCV; JC.         | No                        |
|               |      |         | Gastrosopes, n=2 (biopsy/suction channel)           | 100%, G1: <i>P. aeruginosa</i> . G2: <i>P. aeruginosa</i> .                                                                   | 50%, <i>A. baumannii</i> .                                                                                                                                | No  | Yes | Yes, HCV; TTV.             | Yes, HCV; HIV (430 GC/ml) |
|               |      |         | Linear echoendoscopes, n=2 (biopsy/suction channel) | 50%, <i>K. pneumoniae</i> ; <i>K. oxytoca</i> ; <i>C. perfringens</i> .                                                       | 50%, <i>Bacillus</i> spp; CoNS.                                                                                                                           | Yes | No  | Yes, HCV                   | Yes, HCV                  |
| Hospital VIII | PSC  | 14 days | Colonoscopes, n=2 (biopsy/suction channel)          | 100%, C1: <i>K. pneumoniae</i> ; <i>P. aeruginosa</i> ; <i>E. aerogenes</i> ; CoNS.                                           | 100%, C1: <i>E. coli</i> ; <i>P. aeruginosa</i> . C2: <i>P. aeruginosa</i> ; <i>C. difficile</i> ( <i>tcdA</i> <sup>+</sup> , <i>tcdB</i> <sup>+</sup> ). | Yes | Yes | No                         | No                        |

|             |      |         |                                                     |                                                                                                                                      |                                                                                                  |     |     |                                  |                   |
|-------------|------|---------|-----------------------------------------------------|--------------------------------------------------------------------------------------------------------------------------------------|--------------------------------------------------------------------------------------------------|-----|-----|----------------------------------|-------------------|
|             |      |         |                                                     | C2: <i>P. aeruginosa</i> [2 different strains]; <i>E. aerogenes</i> .                                                                |                                                                                                  |     |     |                                  |                   |
|             |      |         | Gastrosopes, n=3 (biopsy/suction channel)           | 100%, G1: <i>P. aeruginosa</i> . G2: <i>C. albicans</i> ; <i>E. aerogenes</i> ; CoNS.                                                | 50%, <i>C. albicans</i> .                                                                        | Yes | No  | Yes, HBV                         | No                |
|             |      |         | Linear echoendoscopes, n=1 (biopsy/suction channel) | 100%, <i>K. pneumoniae</i> ; <i>S. aureus</i> .                                                                                      | 100%, <i>P. aeruginosa</i> .                                                                     | Yes | Yes | No                               | No                |
|             |      |         | Duodenoscopes, n=1 (biopsy/suction channel)         | 100%, <i>P. aeruginosa</i> ; <i>E. aerogenes</i> .                                                                                   | 100%, <i>P. aeruginosa</i> .                                                                     | Yes | Yes | No                               | No                |
|             |      |         | Duodenoscopes, n=1 (elevator channel)               | 100%, <i>P. aeruginosa</i> ; <i>E. aerogenes</i> .                                                                                   | 100%, <i>P. aeruginosa</i> ; <i>E. aerogenes</i> .                                               | Yes | Yes | No                               | No                |
|             |      |         | AERs, n=1 (swab sample)                             | 100%, <i>P. aeruginosa</i> ; <i>E. aerogenes</i> .                                                                                   | 0%, No growth                                                                                    | Yes | No  | No                               | No                |
| Hospital IX | PSC  | 14 days | Colonoscopes, n=3 (biopsy/suction channel)          | 33.3%, <i>P. aeruginosa</i> ; <i>E.coli</i> ; <i>C. freundii</i> .                                                                   | 33.3%, <i>E.coli</i> ; <i>E. faecium</i> .                                                       | Yes | Yes | No                               | No                |
|             |      |         | Gastrosopes, n=4 (biopsy/suction channel)           | 50%, G1: <i>P. aeruginosa</i> . G2: <i>C. freundii</i> .                                                                             | 0%, No growth                                                                                    | Yes | No  | No                               | No                |
|             |      |         | Duodenoscopes, n=1 (biopsy/suction channel)         | 100%, <i>P. aeruginosa</i> ; <i>C. glabrata</i> .                                                                                    | 100%, <i>C. albicans</i>                                                                         | No  | No  | No                               | No                |
|             |      |         | Duodenoscopes, n=1 (elevator channel)               | 100%, <i>P. aeruginosa</i>                                                                                                           | 0%, No growth                                                                                    | No  | No  | No                               | No                |
|             |      |         | Linear echoendoscopes, n=1 (biopsy/suction channel) | 0%, No growth                                                                                                                        | 100%, <i>Bacillus</i> spp.                                                                       | No  | No  | No                               | No                |
|             |      |         | AERs, n=1 (swab sample)                             | 100%, <i>P. aeruginosa</i> ; <i>C. freundii</i> ; CoNS.                                                                              | 0%, No growth.                                                                                   | Yes | No  | No                               | No                |
| Hospital X  |      | 25 days | Colonoscopes, n=4 (biopsy/suction channel)          | 50%, C1: <i>E.coli</i> ; <i>C. difficile</i> . C2: <i>E.coli</i> ; <i>K. pneumoniae</i> .                                            | 50%, C1: <i>E.coli</i> . C4: <i>C. perfringens</i> .                                             | Yes | No  | No                               | No                |
|             |      |         | Duodenoscopes, n=4 (biopsy/suction channel)         | 75%, D1: <i>E.coli</i> ; <i>P. mirabilis</i> . D2: <i>E.coli</i> ; <i>P. aeruginosa</i> . D3: <i>E.coli</i> ; <i>P. aeruginosa</i> . | 75%, D2: <i>C. freundii</i> . D3: <i>E.coli</i> ; <i>M. morgani</i> . D4: <i>P. aeruginosa</i> . | Yes | Yes | Yes, HBV; HCV; TTV; Crass Phage. | Yes, Crass Phage. |
|             |      |         | Duodenoscopes, n=4 (elevator channel)               | 75%, D1: <i>E.coli</i> . D2: <i>P. aeruginosa</i> . D3: <i>E.coli</i> ; <i>P. aeruginosa</i> .                                       | 50%, D2: <i>C. freundii</i> . D4: <i>P. aeruginosa</i> .                                         | Yes | Yes | No                               | No                |
|             |      |         | Linear echoendoscopes, n=6 (biopsy/suction channel) | 16.7%, <i>P. aeruginosa</i> .                                                                                                        | 16.7%, <i>P. aeruginosa</i> ; <i>S. maltophilia</i> .                                            | Yes | Yes | Yes, TTV; Crass Phage.           | Yes, Crass Phage. |
| Hospital XI | ATRC |         | Colonoscopes, n=3                                   | 100%,                                                                                                                                | 33.3%,                                                                                           | Yes | Yes | No                               | No                |

|               |      |         |                                                     |                                                                                                                                                                     |                                                                                          |     |     |          |    |
|---------------|------|---------|-----------------------------------------------------|---------------------------------------------------------------------------------------------------------------------------------------------------------------------|------------------------------------------------------------------------------------------|-----|-----|----------|----|
|               |      |         | (biopsy/suction channel)                            | C1: <i>E.coli</i> ; <i>C. difficile</i> .<br>C2: <i>E.coli</i> ; <i>A. baumannii</i> .<br>C3: <i>C. albicans</i> ; <i>K. oxytoca</i> .                              | <i>C. perfringens</i> ; <i>A. baumannii</i> .                                            |     |     |          |    |
|               |      |         | Gastrosopes, n=3 (biopsy/suction channel)           | 66.7%,<br>G1: <i>E.coli</i> [two different strains];<br><i>Bacillus</i> spp.<br>G2: <i>C. perfringens</i> .                                                         | 33.3%,<br><i>E.coli</i> ; <i>C. parapsilosis</i>                                         | Yes | No  | Yes, HBV | No |
|               |      |         | Duodenoscopes, n=1 (biopsy/suction channel)         | 100%,<br><i>A. baumannii</i> .                                                                                                                                      | No growth.                                                                               | Yes | No  | Yes, HBV | No |
| Hospital XII  | ATRC | 30 days | Colonoscopes, n=2 (biopsy/suction channel)          | 100%,<br>C1: <i>E.coli</i> [two different strains].<br>C2: <i>E.coli</i> ; <i>P. aeruginosa</i> ; <i>K. pneumoniae</i> .                                            | 50%,<br><i>E.coli</i> .                                                                  | Yes | Yes | Yes, HCV | No |
|               |      |         | Gastrosopes, n=2 (biopsy/suction channel)           | 100%,<br>G1: <i>P. aeruginosa</i> .<br>G2: <i>P. aeruginosa</i> ; <i>K. pneumoniae</i> .                                                                            | 100%,<br><i>P. aeruginosa</i> ; <i>S. aureus</i> .                                       | Yes | No  | No       | No |
|               |      |         | AERs, n=1 (swab sample)                             | 100%,<br><i>E.coli</i> .                                                                                                                                            | 100%,<br><i>E.coli</i> .                                                                 | Yes | Yes | No       | No |
|               |      |         | AERs, n=1 (HLD solution)                            | 100%,<br><i>E.coli</i> .                                                                                                                                            | 0%,<br>No growth.                                                                        | Yes | No  | No       | No |
| Hospital XIII | PSC  | 14 days | AERs, n=2 (swab sample)                             | 50%,<br><i>P. aeruginosa</i> ;                                                                                                                                      | 0%,<br>No growth.                                                                        | No  | No  | No       | No |
| Hospital XIV  | PSC  | 28 days | Colonoscopes, n=3 (biopsy/suction channel)          | 100%,<br>C1: <i>K. pneumoniae</i> [two different strains].<br>C2: <i>K. pneumoniae</i> ; <i>E. faecium</i> [VRE].<br>C3: <i>K. pneumoniae</i> ; <i>E. faecium</i> . | 66.6%,<br>C1: <i>K. pneumoniae</i> ; <i>A. baumannii</i> .<br>C2: <i>K. pneumoniae</i> . | Yes | Yes | No       | No |
|               |      |         | Gastrosopes, n=4 (biopsy/suction channel)           | 50%,<br>G1: <i>P. aeruginosa</i> .<br>G2: <i>A. baumannii</i> .                                                                                                     | 50%,<br>G1: Viridance Streptococci.<br>G2: <i>A. baumannii</i> ; <i>Bacillus</i> spp.    | Yes | Yes | No       | No |
|               |      |         | Linear echoendoscopes, n=1 (biopsy/suction channel) | 100,<br>E1: <i>P. aeruginosa</i> .                                                                                                                                  | 100,<br>E1: <i>P. aeruginosa</i> ; <i>Bacillus</i> spp.                                  | No  | No  | No       | No |
| Hospital XV   | PSC  | 10 days | Colonoscopes, n=3 (biopsy/suction channel)          | 33.3%,<br><i>E. faecalis</i> [VRE];<br><i>K. oxytoca</i> .                                                                                                          | 66.6%,<br>C1: <i>A. baumannii</i> [XDR].<br>C2: <i>A. baumannii</i> [XDR].               | Yes | Yes | No       | No |
|               |      |         | Gastrosopes, n=4 (biopsy/suction channel)           | 50%,<br>G1: <i>P. putida</i> .<br>G2: <i>P. putida</i> .                                                                                                            | 0%,<br>No growth.                                                                        | No  | No  | No       | No |

<sup>a</sup> XDR-*A. baumannii*: an extensively drug-resistant (XDR) *Acinetobacter baumannii* presented in this sample which was resistant to all antibiotics (all active antibiotic categories against considered microorganisms), except colistin and tigecycline.

ATRCs, academic tertiary referral medical centres; ERCP, endoscopic retrograde cholangiopancreatography; HLD, high-level disinfectant; MRO, multidrug-resistant organism(s); PSCs, private specialized medical centres.

Supplemental Figures.

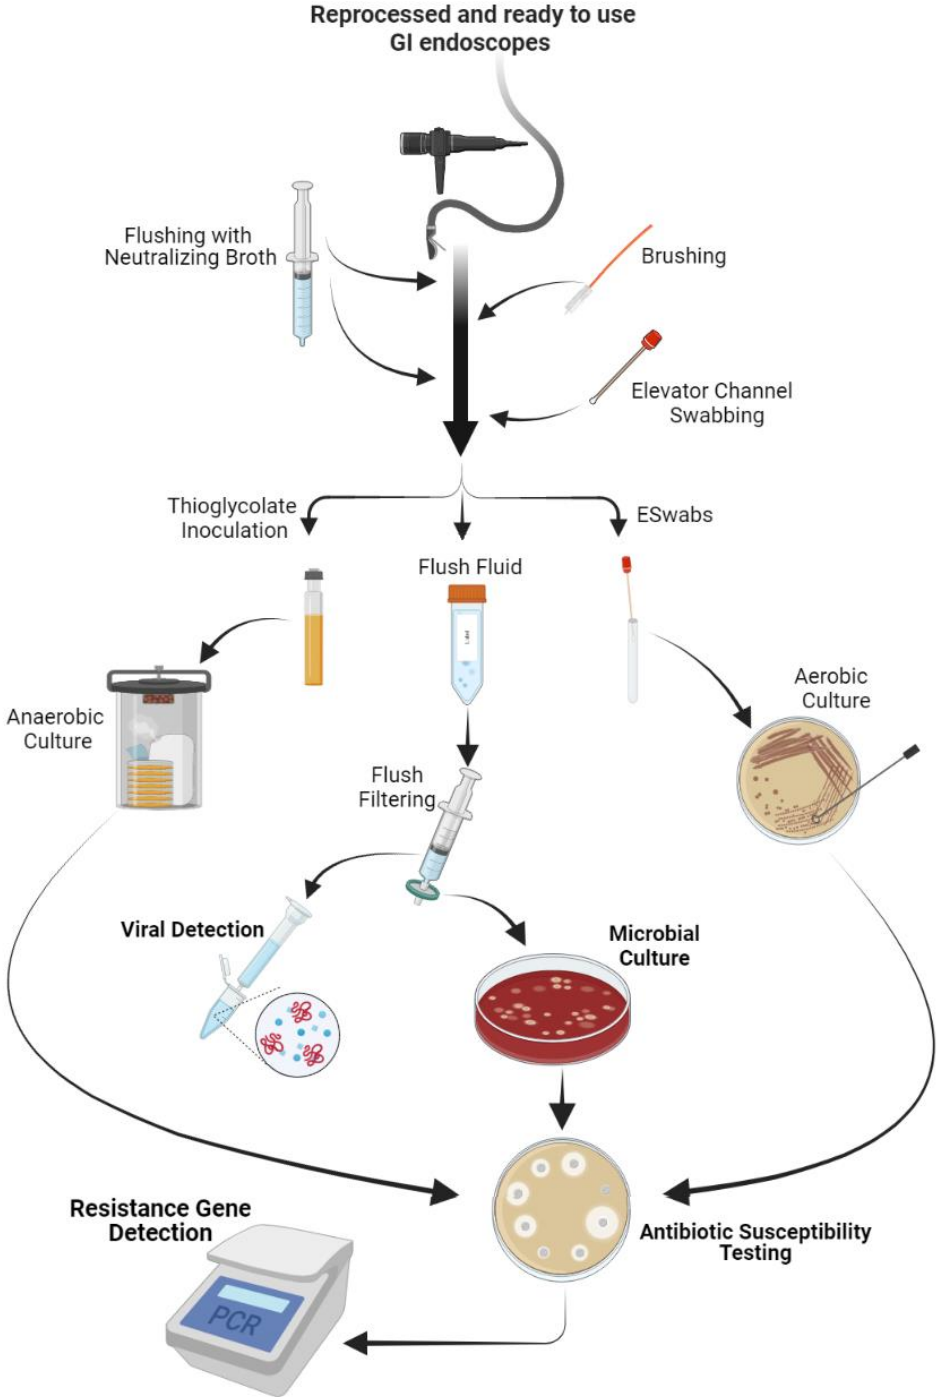

Figure S1. Flow diagram indicating sampling strategy, bacterial and viral identification, and resistance genes detection in this study.
